# Supplementary material for: Generation and comparison of CRISPR-Cas9 and Cre-mediated genetically engineered mouse models of sarcoma
Source: PubMed Central journal article supplement (PMC5508130; doi:10.1038/ncomms15999), 2017-07-10
Supplement: ncomms15999-s1.pdf [file ncomms15999-s1.pdf]

File name: Supplementary Information

Description: Supplementary figures and supplementary tables.

File name: Peer review file

Description:

## Supplementary Figure 1

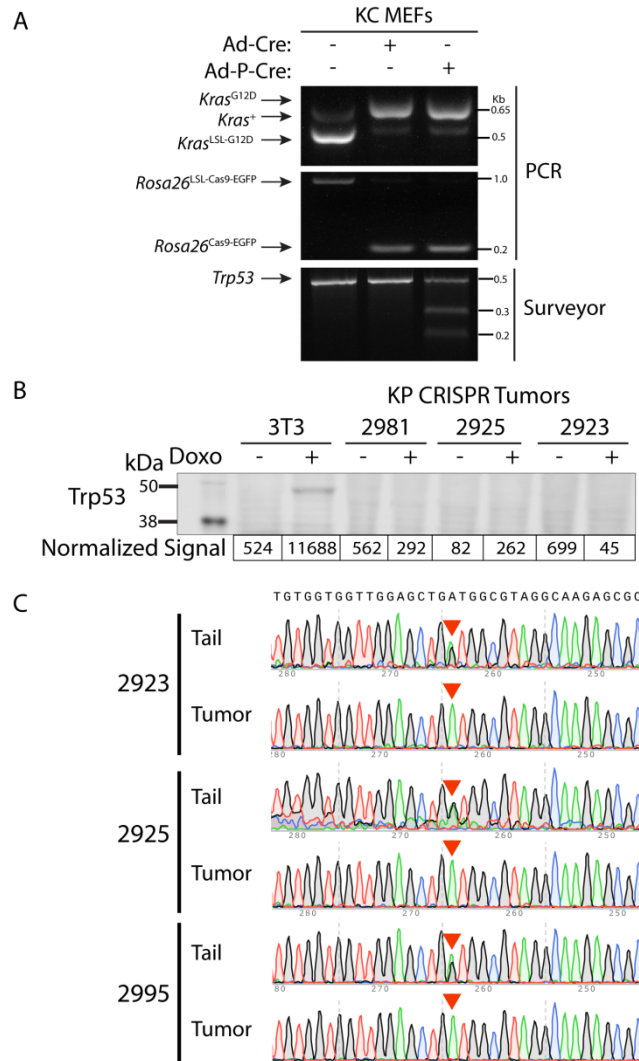

**Supplementary Figure 1. Validation of Ad-sgTrp53-Cre adenovirus particles and *Kras* and *Trp53* status in KP CRISPR tumors.** (A) PCR analysis of genomic DNA from KC MEFs following Ad-sgTrp53-Cre transduction demonstrates successful Cre-mediated recombination of loxP-STOP-loxP cassettes as shown by the presence of the *Kras*<sup>G12D</sup> and *Rosa26*<sup>Cas9-EGFP</sup> bands (and corresponding absence of *Kras*<sup>LSL-G12D</sup> and *Rosa26*<sup>LSL-Cas9-EGFP</sup> bands) in KC MEFs transduced with Ad-Cre or Ad-sgTrp53-Cre. Surveyor assay shows the presence of cleaved heteroduplexes only in Ad-sgTrp53-Cre transduced KC MEFs confirming sgTrp53 and Cas9 activity. (B) Western blot for Trp53 shows that Trp53 expression is not induced in CRISPR-generated KP tumors after exposure to 0.5 µg/mL doxorubicin for 8 hours. 3T3 mouse fibroblasts served as a positive control for induction of Trp53 expression. Target protein quantification was normalized to total protein. (C) Detection of wild type *Kras* and *Kras*<sup>G12D</sup> alleles. Both wild type *Kras* (G, black) and *Kras*<sup>G12D</sup> (A, green) alleles were detected in KC tails, but only *Kras*<sup>G12D</sup> was detected in KC tumors. The result is representative of at least two different experiments.

**Supplementary Figure 2**

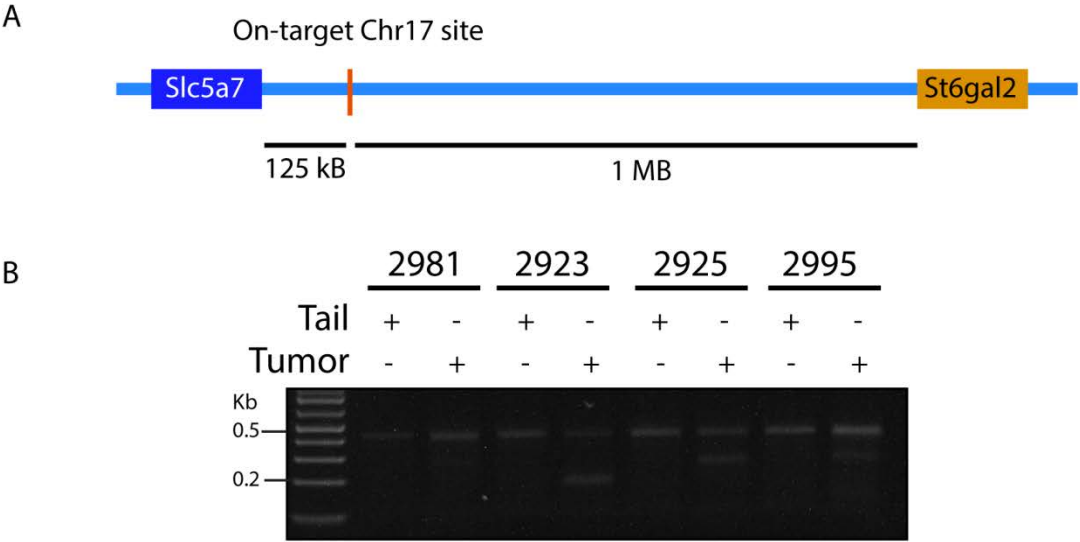

**Supplementary Figure 2. Validation of sgTrp53 on-target chromosome 17 site.** (A) Nearest adjacent protein coding genes to the sgTrp53 targeted region on chromosome 17. (B) Surveyor analysis revealed indels in the on-target chromosome 17 site in the same four cell lines from which we analyzed *Trp53* modification.

### Supplementary Figure 3

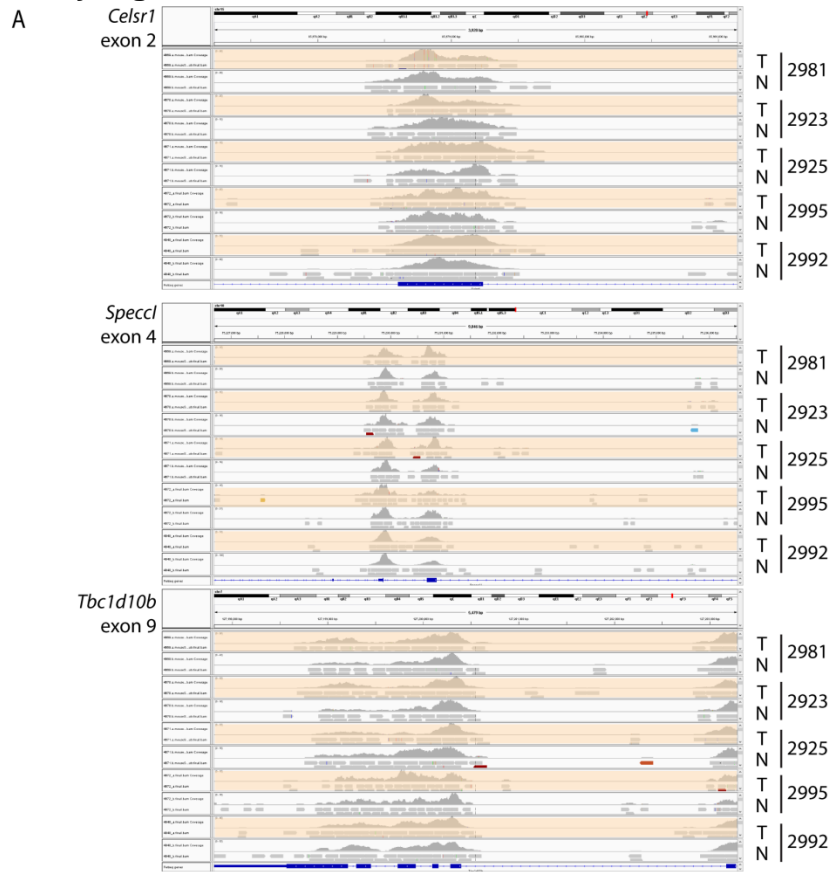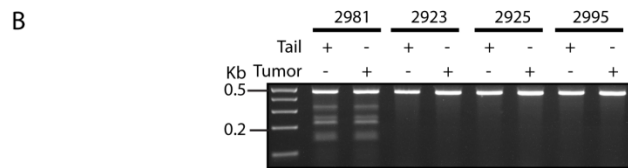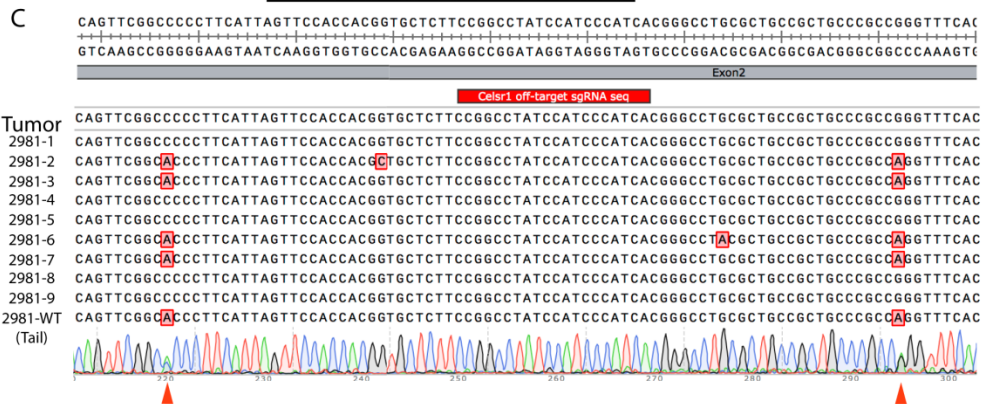

**Supplementary Figure 3. *Celrs1* off-target validation.** (A) Surveyor analysis of off-target *Celrs1* exon 2 in the same four cell lines from which we analyzed *Trp53* modification. (B) Sanger sequencing of off-target *Celrs1* exon 2 in the tumor cell lines-2981 with the same mouse tail DNA as control. T = tumor, N = normal.

## Supplementary Figure 4

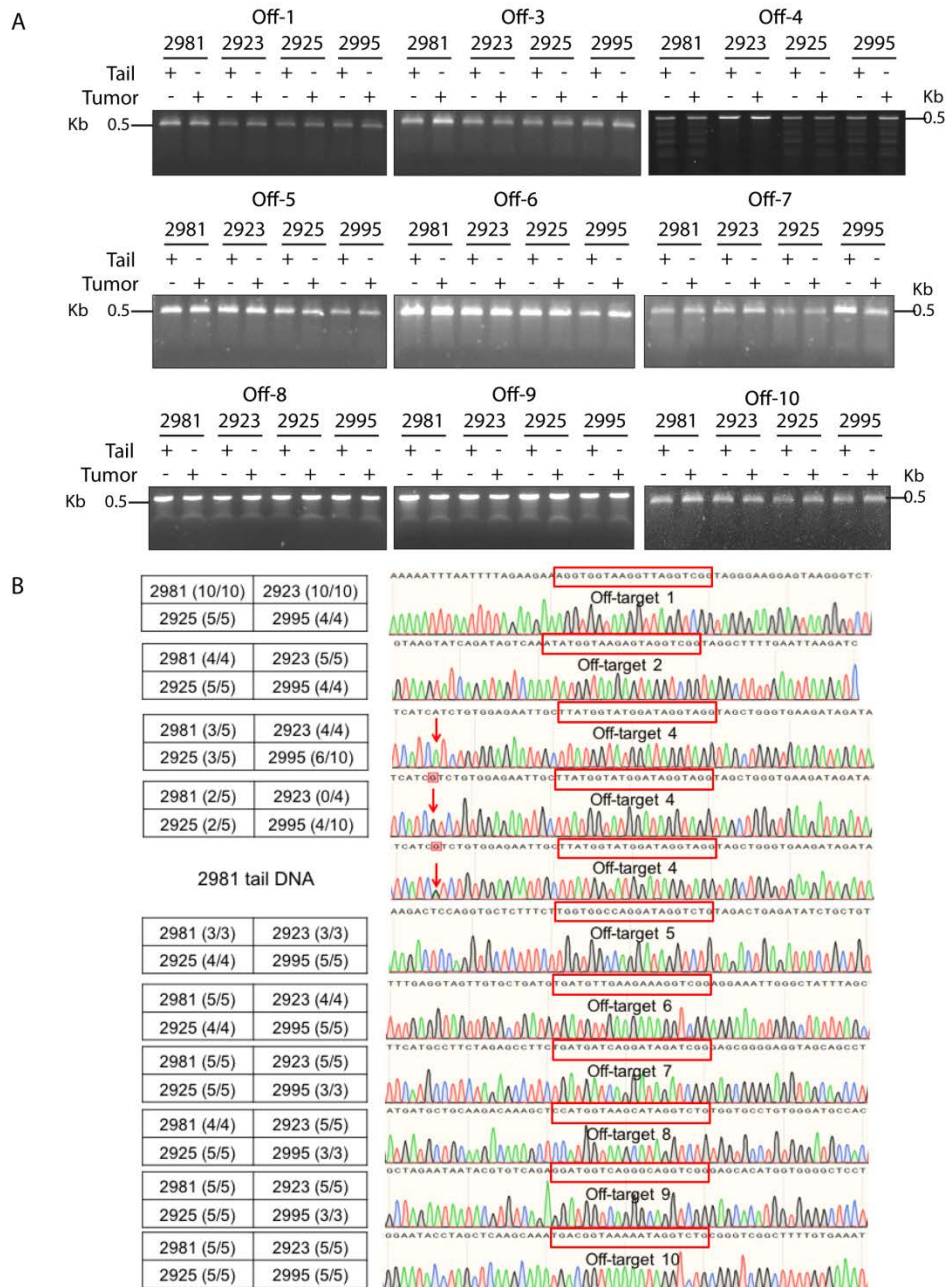

**Supplementary Figure 4. Validation of the remaining top 9 off-targets.** (A) Surveyor analysis of remaining top 9 off-targets in the same four cell lines from which we analyzed *Trp53* modifications. (B) Sanger sequencing of remaining top 9 off-targets in the same four cell lines from which we analyzed *Trp53* modifications.

## Supplementary Figure 5

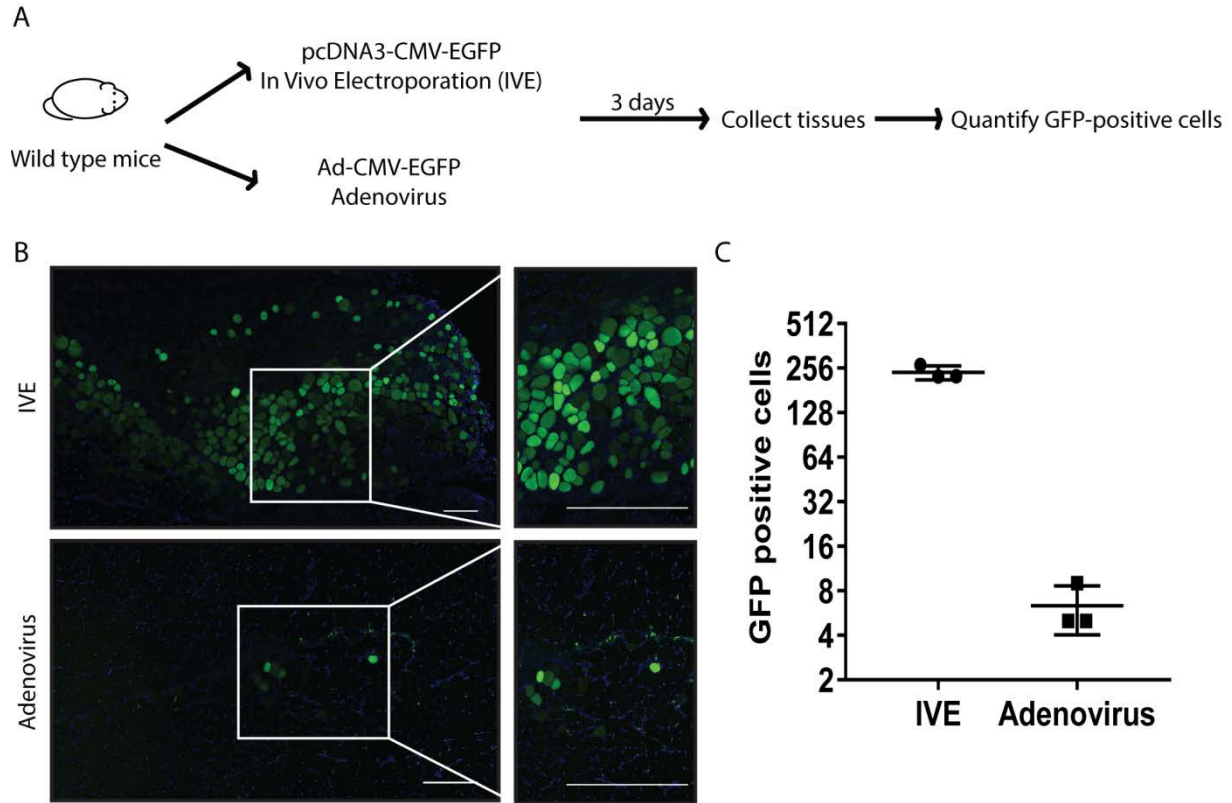

**Supplementary Figure 5. Comparison of the efficiency of GFP expression in muscle after in vivo electroporation (IVE) and adenovirus delivery.** (A) Wild type mice received intramuscular delivery of either an adenovirus expressing EGFP ( $n = 3$ ) or naked plasmid pcDNA3-EGFP with IVE ( $n = 3$ ). Skeletal muscle from the site of injection or IVE was analyzed for GFP expression 3 days later. (B) Fluorescence microscopy was performed and representative images are shown. (C) Quantification of the number of GFP-positive cells in skeletal muscle in a section from three different mice that received intramuscular injection of adenovirus or IVE. Scale bars = 200  $\mu\text{m}$ .

## Supplementary Figure 6

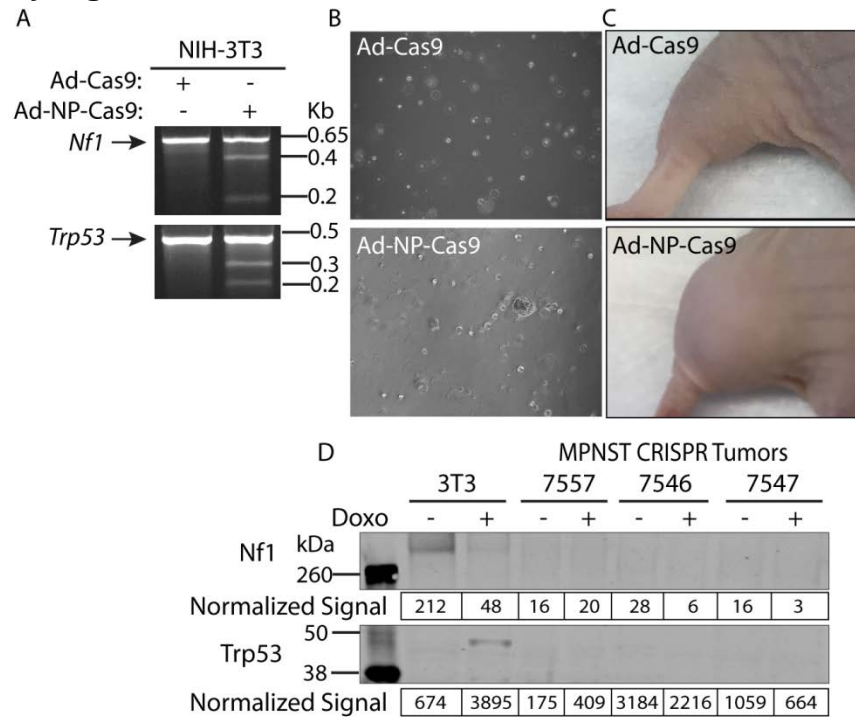

**Supplementary Figure 6. Validation of Ad-sgNf1-sgTrp53-Cas9 adenovirus particles *in vitro* and *in vivo*.** (A) Surveyor assay detects indels by the presence of cleaved heteroduplexes in genomic DNA isolated from 3T3 cells transduced with Ad-sgNf1-sgTrp53-Cas9. No indels were detected when Ad-Cas9 was introduced with no sgRNAs targeting *Nf1* or *Trp53*. (B) Wild type MEFs transduced with Ad-sgNf1-sgTrp53-Cas9 are transformed and formed colonies in soft agar, but MEFs transduced with Ad-Cas9 alone are not transformed and do not form colonies. The result is representative of at least two different experiments. (C) MEFs transformed with Ad-sgNf1-sgTrp53-Cas9 form tumors *in vivo* after allotransplantation into nude mice ( $n = 2$ ). (D) Western blot



## Supplementary Figure 7

Supplementary Figure 1B.

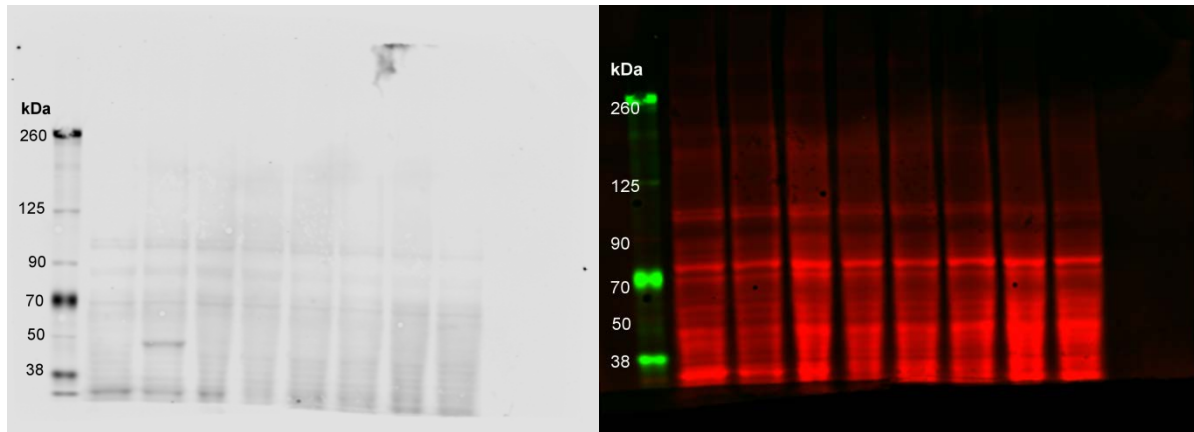

Supplementary Figure 6D.

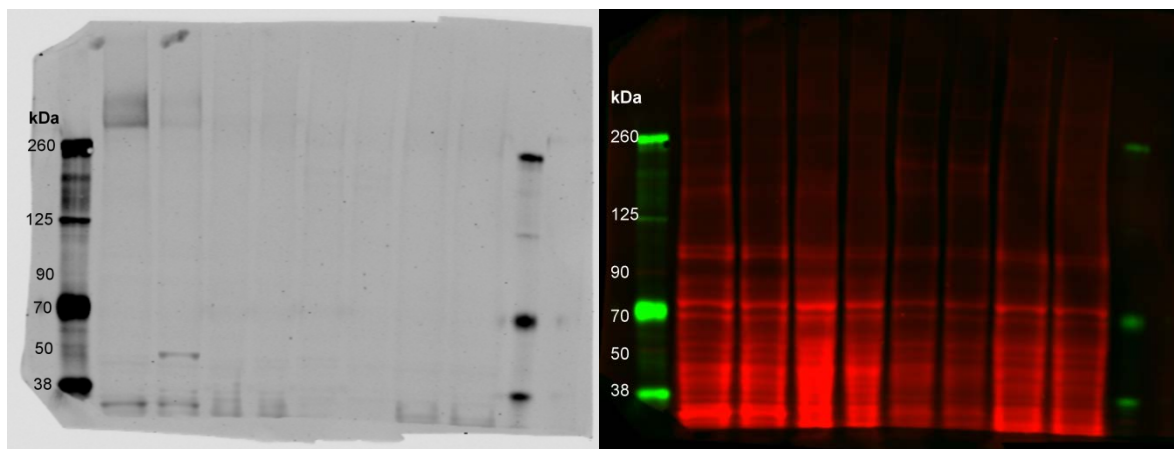

**Supplementary Figure 7. Images of full western blots.** Immunoblotting, image acquisition and analysis parameters are detailed in the methods.



### Supplementary Table 1

sgRNA sequences (PAM sequence in bold)

| <b>Target gene</b> | <b>sgRNA ID</b> | <b>Target sequence (5' to 3')</b> |
|--------------------|-----------------|-----------------------------------|
| Trp53              | sgTrp53         | GATGGTAAGGATAGGTCGG <b>CGG</b>    |
| Nf1                | sgNf1           | GGACATCTCCAAGGATGTGG <b>TGG</b>   |

## Supplementary Table 2

Detailed summary of deep sequencing of 2 on-target sequences

| Normal muscles                     |         |             |          |           |          | Tumors                             |         |             |          |           |          |
|------------------------------------|---------|-------------|----------|-----------|----------|------------------------------------|---------|-------------|----------|-----------|----------|
| #                                  | %Indels | Total Reads | Deletion | Insertion | Mismatch | #                                  | %Indels | Total Reads | Deletion | Insertion | Mismatch |
| On-target<br><i>Trp53</i><br>#2981 | 0.03%   | 65030       | 0.03%    | 0.00%     | 2.17%    | On-target<br><i>Trp53</i><br>#2981 | 0.74%   | 36123       | 0.50%    | 0.24%     | 2.12%    |
| On-target<br><i>Trp53</i><br>#2995 | 0.05%   | 36472       | 0.05%    | 0.00%     | 2.24%    | On-target<br><i>Trp53</i><br>#2995 | 27.87%  | 47553       | 27.87%   | 0.00%     | 2.51%    |
| On-target<br><i>Trp53</i><br>#2925 | 0.05%   | 48063       | 0.05%    | 0.00%     | 2.00%    | On-target<br><i>Trp53</i><br>#2925 | 52.30%  | 36831       | 52.30%   | 0.00%     | 2.77%    |
| On-target<br><i>Trp53</i><br>#2923 | 0.05%   | 49966       | 0.05%    | 0.00%     | 2.15%    | On-target<br><i>Trp53</i><br>#2923 | 0.04%   | 45591       | 0.04%    | 0.00%     | 2.21%    |
| On-target<br><i>Trp53</i><br>#2992 | 0.04%   | 44945       | 0.04%    | 0.00%     | 2.08%    | On-target<br><i>Trp53</i><br>#2992 | 1.02%   | 51076       | 0.80%    | 0.22%     | 2.09%    |
| On-target<br>Chr17<br>#2981        | 0.39%   | 4E+05       | 0.34%    | 0.04%     | 3.52%    | On-target<br>Chr17<br>#2981        | 41.18%  | 246157      | 40.99%   | 0.18%     | 3.93%    |
| On-target<br>Chr17<br>#2995        | 0.37%   | 3E+05       | 0.32%    | 0.06%     | 3.48%    | On-target<br>Chr17<br>#2995        | 16.92%  | 243294      | 10.92%   | 6.00%     | 4.48%    |
| On-target<br>Chr17<br>#2925        | 0.37%   | 4E+05       | 0.33%    | 0.04%     | 3.42%    | On-target<br>Chr17<br>#2925        | 57.82%  | 280932      | 57.01%   | 0.81%     | 2.02%    |
| On-target<br>Chr17<br>#2923        | 0.34%   | 3E+05       | 0.31%    | 0.03%     | 3.15%    | On-target<br>Chr17<br>#2923        | 10.57%  | 397631      | 0.36%    | 10.21%    | 3.76%    |
| On-target<br>Chr17<br>#2992        | 0.45%   | 4E+05       | 0.33%    | 0.12%     | 3.38%    | On-target<br>Chr17<br>#2992        | 80.70%  | 73647       | 80.68%   | 0.02%     | 3.31%    |

### Supplementary Table 3

Detailed summary of deep sequencing of top 10 off-target sequences

| Normal muscles |         |             |          |           |          | Tumors     |         |             |          |           |          |
|----------------|---------|-------------|----------|-----------|----------|------------|---------|-------------|----------|-----------|----------|
| #              | %Indels | Total Reads | Deletion | Insertion | Mismatch | #          | %Indels | Total Reads | Deletion | Insertion | Mismatch |
| OFF1 #2981     | 0.05%   | 53433       | 0.05%    | 0.00%     | 4.47%    | OFF1 #2981 | 0.05%   | 42036       | 0.05%    | 0.00%     | 4.50%    |
| OFF1 #2995     | 0.06%   | 44163       | 0.05%    | 0.00%     | 4.74%    | OFF1 #2995 | 0.07%   | 64554       | 0.07%    | 0.00%     | 4.52%    |
| OFF1 #2925     | 0.05%   | 56572       | 0.05%    | 0.00%     | 4.41%    | OFF1 #2925 | 0.05%   | 48235       | 0.05%    | 0.00%     | 4.32%    |
| OFF1 #2923     | 0.06%   | 54952       | 0.06%    | 0.00%     | 4.59%    | OFF1 #2923 | 0.04%   | 39087       | 0.04%    | 0.00%     | 4.41%    |
| OFF1 #2992     | 0.04%   | 54341       | 0.04%    | 0.00%     | 4.04%    | OFF1 #2992 | 0.07%   | 52933       | 0.07%    | 0.00%     | 4.54%    |
| OFF2 #2981     | 0.03%   | 46370       | 0.03%    | 0.00%     | 2.49%    | OFF2 #2981 | 0.04%   | 38939       | 0.04%    | 0.00%     | 2.33%    |
| OFF2 #2995     | 0.05%   | 38401       | 0.05%    | 0.00%     | 2.33%    | OFF2 #2995 | 0.05%   | 57868       | 0.05%    | 0.00%     | 2.17%    |
| OFF2 #2925     | 0.04%   | 71547       | 0.04%    | 0.00%     | 2.19%    | OFF2 #2925 | 0.03%   | 53459       | 0.03%    | 0.00%     | 2.12%    |
| OFF2 #2923     | 0.03%   | 46992       | 0.03%    | 0.00%     | 2.19%    | OFF2 #2923 | 0.04%   | 38201       | 0.04%    | 0.00%     | 2.15%    |
| OFF2 #2992     | 0.03%   | 53927       | 0.03%    | 0.00%     | 2.29%    | OFF2 #2992 | 0.05%   | 48577       | 0.05%    | 0.00%     | 2.22%    |
| OFF3 #2981     | 0.04%   | 54319       | 0.04%    | 0.00%     | 2.23%    | OFF3 #2981 | 0.02%   | 46119       | 0.02%    | 0.00%     | 2.16%    |
| OFF3 #2995     | 0.03%   | 39117       | 0.03%    | 0.00%     | 2.09%    | OFF3 #2995 | 0.03%   | 48703       | 0.03%    | 0.00%     | 2.15%    |
| OFF3 #2925     | 0.02%   | 54653       | 0.02%    | 0.00%     | 2.21%    | OFF3 #2925 | 0.03%   | 48774       | 0.03%    | 0.00%     | 2.09%    |
| OFF3 #2923     | 0.03%   | 50452       | 0.03%    | 0.00%     | 2.13%    | OFF3 #2923 | 0.02%   | 39669       | 0.02%    | 0.00%     | 1.96%    |
| OFF3 #2992     | 0.03%   | 53132       | 0.03%    | 0.00%     | 2.01%    | OFF3 #2992 | 0.03%   | 46071       | 0.03%    | 0.00%     | 2.00%    |
| OFF4 #2981     | 0.03%   | 47392       | 0.03%    | 0.00%     | 3.26%    | OFF4 #2981 | 0.02%   | 37063       | 0.02%    | 0.00%     | 3.72%    |

|               |       |           |       |       |       |               |       |           |       |       |       |
|---------------|-------|-----------|-------|-------|-------|---------------|-------|-----------|-------|-------|-------|
| OFF4<br>#2995 | 0.05% | 4354<br>4 | 0.05% | 0.00% | 2.24% | OFF4<br>#2995 | 0.03% | 6718<br>7 | 0.03% | 0.00% | 3.36% |
| OFF4<br>#2925 | 0.04% | 6156<br>2 | 0.04% | 0.00% | 3.38% | OFF4<br>#2925 | 0.02% | 5043<br>4 | 0.02% | 0.00% | 3.34% |
| OFF4<br>#2923 | 0.04% | 5278<br>8 | 0.04% | 0.00% | 3.25% | OFF4<br>#2923 | 0.02% | 4746<br>9 | 0.02% | 0.00% | 3.02% |
| OFF4<br>#2992 | 0.07% | 5318<br>2 | 0.07% | 0.00% | 2.74% | OFF4<br>#2992 | 0.03% | 6083<br>8 | 0.03% | 0.00% | 3.14% |
| OFF5<br>#2981 | 0.03% | 6455<br>0 | 0.03% | 0.00% | 2.27% | OFF5<br>#2981 | 0.02% | 5623<br>4 | 0.02% | 0.00% | 2.07% |
| OFF5<br>#2995 | 0.02% | 5627<br>3 | 0.02% | 0.00% | 2.24% | OFF5<br>#2995 | 0.01% | 7599<br>3 | 0.01% | 0.00% | 2.07% |
| OFF5<br>#2925 | 0.02% | 8774<br>4 | 0.02% | 0.00% | 2.16% | OFF5<br>#2925 | 0.02% | 6816<br>6 | 0.02% | 0.00% | 2.02% |
| OFF5<br>#2923 | 0.02% | 6897<br>1 | 0.02% | 0.00% | 2.06% | OFF5<br>#2923 | 0.03% | 5651<br>7 | 0.03% | 0.00% | 2.20% |
| OFF5<br>#2992 | 0.03% | 6209<br>1 | 0.03% | 0.00% | 2.14% | OFF5<br>#2992 | 0.03% | 7147<br>6 | 0.03% | 0.00% | 1.99% |
| OFF6<br>#2981 | 0.03% | 6779<br>4 | 0.03% | 0.00% | 2.55% | OFF6<br>#2981 | 0.05% | 6020<br>7 | 0.05% | 0.00% | 2.40% |
| OFF6<br>#2995 | 0.02% | 5293<br>5 | 0.02% | 0.00% | 2.76% | OFF6<br>#2995 | 0.05% | 9571<br>2 | 0.05% | 0.00% | 2.49% |
| OFF6<br>#2925 | 0.05% | 7958<br>3 | 0.05% | 0.00% | 2.54% | OFF6<br>#2925 | 0.05% | 6236<br>0 | 0.05% | 0.00% | 2.33% |
| OFF6<br>#2923 | 0.05% | 6356<br>9 | 0.05% | 0.00% | 2.50% | OFF6<br>#2923 | 0.04% | 5273<br>6 | 0.04% | 0.00% | 2.46% |
| OFF6<br>#2992 | 0.05% | 6581<br>0 | 0.05% | 0.00% | 2.46% | OFF6<br>#2992 | 0.04% | 8182<br>5 | 0.04% | 0.00% | 2.29% |
| OFF7<br>#2981 | 0.08% | 5783<br>2 | 0.08% | 0.00% | 2.25% | OFF7<br>#2981 | 0.06% | 5398<br>7 | 0.06% | 0.00% | 2.08% |
| OFF7<br>#2995 | 0.06% | 5087<br>7 | 0.06% | 0.00% | 2.54% | OFF7<br>#2995 | 0.07% | 4953<br>5 | 0.07% | 0.00% | 2.30% |
| OFF7<br>#2925 | 0.04% | 5749<br>7 | 0.04% | 0.00% | 2.28% | OFF7<br>#2925 | 0.06% | 5198<br>5 | 0.06% | 0.00% | 2.15% |
| OFF7<br>#2923 | 0.05% | 5767<br>6 | 0.05% | 0.00% | 2.18% | OFF7<br>#2923 | 0.06% | 4720<br>1 | 0.06% | 0.00% | 2.23% |
| OFF7<br>#2992 | 0.08% | 5761<br>8 | 0.08% | 0.00% | 2.17% | OFF7<br>#2992 | 0.05% | 5168<br>8 | 0.05% | 0.00% | 2.16% |
| OFF8<br>#2981 | 0.04% | 5218<br>9 | 0.04% | 0.00% | 2.36% | OFF8<br>#2981 | 0.02% | 3569<br>1 | 0.02% | 0.00% | 2.18% |

|                    |       |           |       |       |       |                    |       |           |       |       |       |
|--------------------|-------|-----------|-------|-------|-------|--------------------|-------|-----------|-------|-------|-------|
| OFF8<br>#2995      | 0.03% | 4308<br>2 | 0.03% | 0.00% | 2.42% | OFF8<br>#2995      | 0.04% | 5038<br>2 | 0.04% | 0.00% | 2.29% |
| OFF8<br>#2925      | 0.03% | 6381<br>5 | 0.03% | 0.00% | 2.32% | OFF8<br>#2925      | 0.03% | 5667<br>4 | 0.03% | 0.00% | 2.18% |
| OFF8<br>#2923      | 0.03% | 5757<br>3 | 0.03% | 0.00% | 2.30% | OFF8<br>#2923      | 0.02% | 4108<br>7 | 0.02% | 0.00% | 2.12% |
| OFF8<br>#2992      | 0.02% | 6415<br>5 | 0.02% | 0.00% | 2.44% | OFF8<br>#2992      | 0.05% | 5548<br>0 | 0.05% | 0.00% | 2.12% |
| OFF9<br>#2981      | 0.04% | 5965<br>4 | 0.04% | 0.00% | 2.09% | OFF9<br>#2981      | 0.03% | 5675<br>4 | 0.03% | 0.00% | 2.12% |
| OFF9<br>#2995      | 0.03% | 5057<br>5 | 0.03% | 0.00% | 2.17% | OFF9<br>#2995      | 0.02% | 6633<br>8 | 0.02% | 0.00% | 2.06% |
| OFF9<br>#2925      | 0.03% | 6684<br>2 | 0.03% | 0.00% | 2.27% | OFF9<br>#2925      | 0.03% | 6798<br>7 | 0.03% | 0.00% | 2.03% |
| OFF9<br>#2923      | 0.03% | 6270<br>1 | 0.03% | 0.00% | 2.12% | OFF9<br>#2923      | 0.03% | 7044<br>5 | 0.03% | 0.00% | 2.11% |
| OFF9<br>#2992      | 0.02% | 5938<br>4 | 0.02% | 0.00% | 1.97% | OFF9<br>#2992      | 0.02% | 6536<br>7 | 0.02% | 0.00% | 1.99% |
| OFF1<br>0<br>#2981 | 0.09% | 7211<br>8 | 0.09% | 0.00% | 1.81% | OFF1<br>0<br>#2981 | 0.09% | 8694<br>8 | 0.09% | 0.00% | 1.70% |
| OFF1<br>0<br>#2995 | 0.08% | 5942<br>6 | 0.08% | 0.00% | 1.79% | OFF1<br>0<br>#2995 | 0.09% | 8208<br>6 | 0.09% | 0.00% | 1.69% |
| OFF1<br>0<br>#2925 | 0.09% | 7234<br>0 | 0.09% | 0.00% | 1.68% | OFF1<br>0<br>#2925 | 0.07% | 7176<br>1 | 0.07% | 0.00% | 1.70% |
| OFF1<br>0<br>#2923 | 0.08% | 7488<br>5 | 0.08% | 0.00% | 1.76% | OFF1<br>0<br>#2923 | 0.10% | 7287<br>3 | 0.10% | 0.00% | 1.74% |
| OFF1<br>0<br>#2992 | 0.07% | 7065<br>5 | 0.07% | 0.00% | 1.84% | OFF1<br>0<br>#2992 | 0.07% | 7847<br>1 | 0.07% | 0.00% | 1.59% |

### Supplementary Table 4

Predicted top 3 off-target exons and top 10 off-targets for sgTrp53 sequences (PAM sequence in bold)

| Target gene | Target exon | sgRNA ID          | Target sequence (5' to 3') |
|-------------|-------------|-------------------|----------------------------|
| Celsr1      | Exon 2      | OFF-target exon 1 | TGATGGGATGGATAGGCCGGAAG    |
| Specc11     | Exon 4      | OFF-target exon 2 | TGAAGGTGAGGACAGGTCTGAGG    |
| Tbc1d10b    | Exon 9      | OFF-target exon 3 | TGATGGTGGGGACAGGTCAGCAG    |
|             |             | OFF-target 1      | AGGTGGTAAGGTTAGGTCGGTAG    |
|             |             | OFF-target 2      | TGATGGGATGGATAGGCCGGAAG    |
|             |             | OFF-target 3      | ATATGGTAAGAGTAGGTCGGTAG    |
|             |             | OFF-target 4      | TTATGGTATGGATAGGTAGGTAG    |
|             |             | OFF-target 5      | TGGTGGCCAGGATAGGTCTGTAG    |
|             |             | OFF-target 6      | TGATGTTGAAGAAAGGTCGGAGG    |
|             |             | OFF-target 7      | TGATGATCAGGATAGATCGGGAG    |
|             |             | OFF-target 8      | CCATGGTAAGCATAGGTCTGTGG    |
|             |             | OFF-target 9      | GGATGGTCAGGGCAGGTCGGGAG    |
|             |             | OFF-target 10     | TGACGGTAAAAATAGGTCTGCGG    |

## Supplementary Table 5

### Primer sequences

| Primer ID                       | Sequence (5' to 3')          | Use                                                                 |
|---------------------------------|------------------------------|---------------------------------------------------------------------|
| sgTrp53 5.1                     | CACCGGATGGTAAGGATAGGTCGG     | Cloning sgTrp53                                                     |
| sgTrp53 3.1                     | AAACCCGACCTATCCTTACCATCC     |                                                                     |
| sgTrp53 svg 5.1                 | TGCCGAACAGGTGGAATATC         | Amplify Trp53 locus for Surveyor + TOPO cloning                     |
| sgTrp53 svg 3.1                 | CATCCTGACTGTGTGTAAACTAGGCCCC |                                                                     |
| sgNf1 5.1                       | CACCGGGACATCTCCAAGGATGTGG    | Cloning sgNf1                                                       |
| sgNf1 3.1                       | AAACCCACATCCTTGGAGATGTCCC    |                                                                     |
| sgNf1 svg 5.1                   | TAGCAATTTTGGGGGAACGC         | Amplify Nf1 locus for Surveyor                                      |
| sgNf1 svg 3.1                   | GTCAGAGCCTTTCAGTCATG         |                                                                     |
| LSL-Cas9 genotyping 5.1         | CTTTTCCTACAGCTCCTGG          | Genotyping for recombination of Cas9 allele                         |
| LSL-Cas9 genotyping 3.1         | CATGGTGGCACGTGTTCGAA         |                                                                     |
| mt KrasG12D 5.1                 | TGTAAGGCCTGCTGAAAATGACT      | Detection of WT Kras and Kras <sup>G12D</sup> allele                |
| mt KrasG12D 3.1                 | TGGACCTTACTCTCTGTGGT         |                                                                     |
| sgTrp53 chr17 on-target svg 5.1 | ATCTCAAAGCGTTCACGCCC         | Amplify on target chr17 site for Surveyor + TOPO cloning            |
| sgTrp53 chr17 on-target svg 3.1 | CGAATATCTGGAAGACAGGC         |                                                                     |
| Celsr1 svg 5.1                  | ATCCAGAACGACACGGACGT         | Amplify on off-target top2 Celsr1 exon2 for Surveyor + TOPO cloning |
| Celsr1 svg 3.1                  | CACAGGCTCCAGACACTTAC         |                                                                     |
| Off-1 svg 5.1                   | GTGGATAGAGACTGCTTTGG         | Amplify on off-target 1 for Surveyor + TOPO cloning                 |
| Off-1 svg 3.1                   | GGGTGTGTTCCCAGAATTCA         |                                                                     |
| Off-3 svg 5.1                   | GGAATGTGCCCATCTGCAAA         | Amplify on off-target 3 for Surveyor + TOPO cloning                 |
| Off-3 svg 3.1                   | GAAGTCCTTCCTGATCCTCC         |                                                                     |
| Off-4 svg 5.1                   | ATGGCATCCACTCTGCTCTT         | Amplify on off-target 4 for Surveyor + TOPO cloning                 |
| Off-4 svg 3.1                   | AGTCATAAGCAGCCCCTCTG         |                                                                     |
| Off-5 svg 5.1                   | GAGTGCCTCAAGCAGTTTG          | Amplify on off-target 5                                             |



|                     |                                                               |                                                      |
|---------------------|---------------------------------------------------------------|------------------------------------------------------|
| Off-5 svg 3.1       | TCCAGGTACCAAACACACAG                                          | for Surveyor + TOPO cloning                          |
| Off-6 svg 5.1       | ACCACCAACAGGAGAACTTC                                          | Amplify on off-target 6 for Surveyor + TOPO cloning  |
| Off-6 svg 3.1       | TATTTGCAGTCACGCTGGGC                                          |                                                      |
| Off-7 svg 5.1       | GCCCCATGAAGCCTCAGTTT                                          | Amplify on off-target 7 for Surveyor + TOPO cloning  |
| Off-7 svg 3.1       | ACAAACCATGGGGACTTCCA                                          |                                                      |
| Off-8 svg 5.1       | TGAGTTCACAGATGCTTTCC                                          | Amplify on off-target 8 for Surveyor + TOPO cloning  |
| Off-8 svg 3.1       | ATCGTGAAGCTGAGGTAGAA                                          |                                                      |
| Off-9 svg 5.1       | GTGTGCTCCAGCAAAACACC                                          | Amplify on off-target 9 for Surveyor + TOPO cloning  |
| Off-9 svg 3.1       | TTCCGTCTATACTCCCCTCC                                          |                                                      |
| Off-10 svg 5.1      | ATGAACATGCTGCAGGCGAC                                          | Amplify on off-target 10 for Surveyor + TOPO cloning |
| Off-10 svg 3.1      | ACCCAATCCCAGGCATTAAT                                          |                                                      |
| ON-target Trp53 Fwd | TCGTCGGCAGCGTCAGATGTGTATAAGAGACAGGT<br>AGGGAGCGACTTCACCTG     | First round PCR for ON-target                        |
| ON-target Trp53 Rev | GTCTCGTGGGCTCGGAGATGTGTATAAGAGACAGC<br>GCCTTCTACCTGGAGTCT     |                                                      |
| ON-target Chr17 Fwd | TCGTCGGCAGCGTCAGATGTGTATAAGAGACAGGC<br>ACAAACACGAACCTCAA      | First round PCR for ON-target Chr17                  |
| ON-target Chr17 Rev | GTCTCGTGGGCTCGGAGATGTGTATAAGAGACAGC<br>GGCTCTGAGTATAACCACCA   |                                                      |
| OFF-target1 Fwd     | TCGTCGGCAGCGTCAGATGTGTATAAGAGACAGTG<br>ATGGCACAGGGCCTTTAA     | First round PCR for OFF-target1                      |
| OFF-target1 Rev     | GTCTCGTGGGCTCGGAGATGTGTATAAGAGACAGG<br>GTCATACTTATCCTTGCCT    |                                                      |
| OFF-target2 Fwd     | TCGTCGGCAGCGTCAGATGTGTATAAGAGACAGGC<br>ACGGATTGGAGTAGCAA      | First round PCR for OFF-target2                      |
| OFF-target2 Rev     | GTCTCGTGGGCTCGGAGATGTGTATAAGAGACAGT<br>GAAATGCGTGTCTGTGCTT    |                                                      |
| OFF-target3 Fwd     | TCGTCGGCAGCGTCAGATGTGTATAAGAGACAGGC<br>CTTCCGATGCTCTAATGA     | First round PCR for OFF-target3                      |
| OFF-target3 Rev     | GTCTCGTGGGCTCGGAGATGTGTATAAGAGACAGG<br>CTGTTAATTTGAACACACCAAA |                                                      |

|                     |                                                             |                                        |
|---------------------|-------------------------------------------------------------|----------------------------------------|
| OFF-target4 Fwd     | TCGTCGGCAGCGTCAGATGTGTATAAGAGACAGCA<br>GCTCTGGGCAATTTGTTT   | First round PCR for OFF-<br>target4    |
| OFF-target4 Rev     | GTCTCGTGGGCTCGGAGATGTGTATAAGAGACAGC<br>TTGGCTTCCAGTCCACAT   |                                        |
| OFF-target5 Fwd     | TCGTCGGCAGCGTCAGATGTGTATAAGAGACAGGC<br>TGTGGAAGACAGGGACTC   | First round PCR for OFF-<br>target5    |
| OFF-target5 Rev     | GTCTCGTGGGCTCGGAGATGTGTATAAGAGACAGT<br>GTGGGGATGTGGAATTGTA  |                                        |
| OFF-target6 Fwd     | TCGTCGGCAGCGTCAGATGTGTATAAGAGACAGGC<br>CCAGTGGTGTGGTTAAAT   | First round PCR for OFF-<br>target6    |
| OFF-target6 Rev     | GTCTCGTGGGCTCGGAGATGTGTATAAGAGACAGA<br>CTTGAAACCGAGACCTCA   |                                        |
| OFF-target7 Fwd     | TCGTCGGCAGCGTCAGATGTGTATAAGAGACAGAC<br>AATGTGCTGACCCTGGAC   | First round PCR for OFF-<br>target7    |
| OFF-target7 Rev     | GTCTCGTGGGCTCGGAGATGTGTATAAGAGACAGG<br>AGACAGCTGGGGTAACTGC  |                                        |
| OFF-target8 Fwd     | TCGTCGGCAGCGTCAGATGTGTATAAGAGACAGCC<br>ATGATTGTGCCTATGTGC   | First round PCR for OFF-<br>target8    |
| OFF-target8 Rev     | GTCTCGTGGGCTCGGAGATGTGTATAAGAGACAGC<br>CATGTCCAGGATGGACTCT  |                                        |
| OFF-target9 Fwd     | TCGTCGGCAGCGTCAGATGTGTATAAGAGACAGGG<br>TCTACCTACTTCCACATTGC | First round PCR for OFF-<br>target9    |
| OFF-target9 Rev     | GTCTCGTGGGCTCGGAGATGTGTATAAGAGACAGG<br>GAGTTTTGTCACAGCCACA  |                                        |
| OFF-target10 Fwd    | TCGTCGGCAGCGTCAGATGTGTATAAGAGACAGTG<br>ATTTCAATGTGGCCTTCA   | First round PCR for OFF-<br>target10   |
| OFF-target10 Rev    | GTCTCGTGGGCTCGGAGATGTGTATAAGAGACAGA<br>AGAAGAATGCCCCCTGATT  |                                        |
| Universal i5 primer | AATGATACGGCGACCACCGAGATCTACACTCGTCTG<br>GCAGCGTC            | Second round PCR for<br>MiSeq analysis |
| BC1                 | CAAGCAGAAGACGGCATAACGAGATACATCGGTCTC<br>GTGGGCTCGG          |                                        |
| BC2                 | CAAGCAGAAGACGGCATAACGAGATTGGTCAGTCTC<br>GTGGGCTCGG          |                                        |
| BC3                 | CAAGCAGAAGACGGCATAACGAGATCACTGTGTCTC<br>GTGGGCTCGG          |                                        |

|      |                                                    |  |
|------|----------------------------------------------------|--|
| BC4  | CAAGCAGAAGACGGCATAACGAGATATTGGCGTCTC<br>GTGGGCTCGG |  |
| BC5  | CAAGCAGAAGACGGCATAACGAGATGATCTGGTCTC<br>GTGGGCTCGG |  |
| BC6  | CAAGCAGAAGACGGCATAACGAGATTACAAGGTCTC<br>GTGGGCTCGG |  |
| BC7  | CAAGCAGAAGACGGCATAACGAGATCGTGATGTCTC<br>GTGGGCTCGG |  |
| BC8  | CAAGCAGAAGACGGCATAACGAGATGCCTAAGTCTC<br>GTGGGCTCGG |  |
| BC9  | CAAGCAGAAGACGGCATAACGAGATTCAAGTGTCTC<br>GTGGGCTCGG |  |
| BC10 | CAAGCAGAAGACGGCATAACGAGATAGCTAGGTCTC<br>GTGGGCTCGG |  |

## Supplementary Table 6

Lists of validated mutations in each tumor tissue

| Method              | Tumor | Validated mutation variants |         |            |        |         |
|---------------------|-------|-----------------------------|---------|------------|--------|---------|
| CreLox              | 4014  | Ttn                         | Limch1  | Cdc27      |        |         |
|                     | 4015  | Rnf152                      | C3ar1   | St6galnac2 |        |         |
|                     | 4017  |                             |         |            |        |         |
|                     | 4018  | Secisbp2l                   | Col25a1 | Grm8       | Otog   | Vmn2r79 |
|                     |       | Ces1c                       | Trpc1   | Naca       | Fat2   | Drd3    |
|                     |       | Cldn8                       |         |            |        |         |
|                     | 4019  |                             |         |            |        |         |
|                     | 4020  | Golga3                      | Myom1   |            |        |         |
| 4021                |       |                             |         |            |        |         |
| CRISPR-Cas9-Cre-Lox | 2923  |                             |         |            |        |         |
|                     | 2925  | Met                         | Hipk2   | Tekt1      | Tsen54 | Clybl   |
|                     |       | Tssk1                       | Mep1a   |            |        |         |
|                     | 2995  | Olfr376                     | Mycs    |            |        |         |
|                     | 2992  | Olfr644                     | Adgra3  | Nlrp1b     | Smc3   |         |
| 2981                |       |                             |         |            |        |         |
